# Supplementary material for: Heterometallic MIL-125(Ti–Al) frameworks for electrochemical determination of ascorbic acid, dopamine and uric acid
Source: Royal Society of Chemistry journal article supplement (doi:10.1039/d4dt00021h), 2024-01-01
Supplement: d4dt00021h1.pdf [file d4dt00021h1.pdf]

## Supplementary Information

### **Heterometallic MIL-125(Ti-Al) frameworks for electrochemical determination of ascorbic acid, dopamine and uric acid**

Ai-Xuan Yu,<sup>a</sup> Xiao-Huan Liang,<sup>a,§</sup> Cun-Di Hao,<sup>a</sup> Xian-Zheng Hu,<sup>a</sup> Jia-Jia Li,<sup>a</sup> Xiang-Jie Bo,<sup>a</sup> Dong-Ying Du<sup>\*a</sup> and Zhong-Min Su<sup>b</sup>

<sup>a</sup> National & Local United Engineering Laboratory for Power Battery, Department of Chemistry, Northeast Normal University, Changchun 130024, P. R. China. Email: dudy540@nenu.edu.cn

<sup>b</sup> College of Science, Hainan University, Haikou 570228, P. R. China

§ Present address: School of Chemistry and Chemical Engineering, Huazhong University of Science and Technology, Wuhan 430074, P. R. China.

## S1. Materials and instruments

All the used chemical agents were analytical grade and used without further purification, except for aluminum nitrate nonahydrate ( $\text{Al}(\text{NO}_3)_3 \cdot 9\text{H}_2\text{O}$ ) and methanol ( $\text{CH}_3\text{OH}$ ).  $\text{Al}(\text{NO}_3)_3$  was obtained by treating  $\text{Al}(\text{NO}_3)_3 \cdot 9\text{H}_2\text{O}$  with decrystallized water, and methanol were put into the follow-up experiment after spinning distillation. Phosphate buffered solution (PBS, 0.1 M) was prepared by mixing the standard stock solution of 0.1 M of  $\text{NaH}_2\text{PO}_4$  and hydrochloric acid. All the chemicals used were of analytical grades and aqueous solutions were prepared with deionized water. High purity nitrogen was used for deaeration.

Powder X-ray diffraction (PXRD) patterns were monitored on a SmartLab diffractometer using a Bruker D8-Focus Bragg-Brentano X-ray Powder Diffractometer with a  $\text{Cu-K}\alpha$  radiation. The patterns were recorded in the  $2\theta$  angular range of  $5 - 50^\circ$  with a scan rate of  $10^\circ \cdot \text{min}^{-1}$ . Scanning electron microscopy (SEM) images were obtained with a Hitachi SU8010 microscope. Energy-dispersive X-ray spectroscopy (EDS) of MIL-125(Ti-Al)- $x\text{NH}_2$  was performed with a Hitachi microscope (SU8010,  $x = 0\%$  and  $25\%$ , and SU5000,  $x = 50\%$ ,  $75\%$  and  $100\%$ ). UV-Vis spectroscopy was recorded using a U-3900 spectrophotometer. Inductively coupled plasma atomic emission spectrometry (ICP-AES) was carried out on a Prodigy.

## S2. Solvothermal synthesis of MIL-125(Ti-Al)- $x\text{NH}_2$ series

A mixture of titanium isopropoxide (0.2 mL, 0.67 mmol) and aluminum nitrate (16 mg, 0.075 mmol) as the metal sources, and 1,4-benzenedicarboxylic acid ( $\text{H}_2\text{BDC}$ ) and 2-aminoterephthalic acid ( $\text{NH}_2\text{-H}_2\text{BDC}$ ) in different proportions (1.5 mmol, 4:0, 3:1, 2:2, 1:3, 0:4) as the organic linkers was stirred ultrasonically in DMF (4 mL) and  $\text{CH}_3\text{OH}$  (1 mL) for 0.5 h. Then the resultant solution was placed in a Teflon vessel in a steel autoclave, heated at  $160^\circ\text{C}$  for 48 h, then cooled to room temperature. The products were recovered by filtration, washed three times with DMF to remove the unreacted organic ligand, and then washed with methanol. Finally, the obtained crystalline products (MIL-125(Ti-Al)- $x\text{NH}_2$  ( $x = 0\%$ ,  $25\%$ ,  $50\%$ ,  $75\%$ , and  $100\%$ )) were dried under vacuum for subsequent experiments.

### **S3. Electrochemical studies**

All electrochemical operations were conducted using CHI-760D (Chenhua, Shanghai) electrochemical station. A traditional three-electrode system was employed for all purposes, where a modified glassy carbon electrode (GCE) (3.0 mm diameter, 0.0706 cm<sup>2</sup> geometric area) was used as the working electrode, Ag/AgCl as the reference electrode, and a Pt wire as the counter electrode. The GCE was respectively polished with 0.3 and 0.05 μm alumina slurry followed by rinsing thoroughly with double distilled water, and then ultrasonically cleaned in ethanol and double distilled water to obtain a mirror-like surface. The as-prepared MIL-125(Ti-Al)-*x*NH<sub>2</sub> (*x* = 0%, 25%, 50%, 75%, and 100%) were mixed with carbon black (Vulcan XC-72R) in different mass ratios and added with deionized water (950 μL) containing 0.5 wt% Nafion (50 μL) by ultrasonication for 30 min at least. Then, 7.5 μL of catalyst ink was dropped onto the well-polished bare GCE and then evaporated in air. The resultant modified electrode was denoted as MIL-125(Ti-Al)-*x*NH<sub>2</sub>/GCE and used for the electrochemical separately and simultaneously detection of ascorbic acid (AA), dopamine (DA) and uric acid (UA). The whole procedure was performed in 0.1 M PBS. The PBS was deoxygenated before each electrochemical operation by purging with high-purity N<sub>2</sub> gas.

### **S4. Selectivity study**

To estimate the selectivity, some interfering substances of MIL-125(Ti-Al)-*x*NH<sub>2</sub>/GCE electrodes were investigated under the same experimental condition. 1 mM of citric acid (CA) and lactic acid (LA), 1.5 mM of glucose (Glu), 50 μM of L-phenylalanine (L-Phe), glycine (Gly), and L-cysteine(L-Cys) were added separately to the detection system. Meanwhile, inorganic salts such as NaCl, KCl, MgSO<sub>4</sub>, CaCl<sub>2</sub>, and Na<sub>2</sub>CO<sub>3</sub> were introduced with a concentration of 1 M, respectively.

### **S5. Real sample analysis**

To assess the validity and reliability of the proposed sensor in practice, the analytical determinations of UA, DA, and AA in commercially available vitamin C tablets, dopamine hydrochloride injection and sweat samples were selected as real samples for analysis by using the standard addition method. Firstly, 0.028 g of vitamin C

tablets (122 mg/0.65 g) were crushed, weighted, and dissolved in 30 mL PBS (pH 7.10). Then 5 mL of solution were transferred into an electrochemical cell. Secondly, 8  $\mu$ L of dopamine hydrochloride injection (20 mg/2 mL) was diluted into 20 mL PBS (pH 7.10) for individual detection of DA. Thirdly, prior to physical testing, each subject agreed to an informed consent form and human sweat samples were directly employed after purification. The above-mentioned diluted samples were spiked with certain amounts of AA, DA, and UA before monitored, to ascertain the correctness.

Human sweat samples were collected from healthy subject in compliance with all the ethical guidelines under a protocol (ID 202302017) that was approved by Northeast Normal University. Subject gave written informed consent before participation in the study.

## S6. Supporting tables

**Table S1.** The ratios of Ti:Al in MIL-125(Ti-Al)- $x$ NH<sub>2</sub> ( $x = 0\%$ , 25%, 50%, 75%, and 100%) materials.

| As-prepared Products               | Feeding | ICP results |
|------------------------------------|---------|-------------|
| MIL-125(Ti-Al)-0%NH <sub>2</sub>   |         | 5.34:2.35   |
| MIL-125(Ti-Al)-25%NH <sub>2</sub>  |         | 5.65:2.35   |
| MIL-125(Ti-Al)-50%NH <sub>2</sub>  | 9:1     | 5.54:2.46   |
| MIL-125(Ti-Al)-75%NH <sub>2</sub>  |         | 5.88:2.12   |
| MIL-125(Ti-Al)-100%NH <sub>2</sub> |         | 5.51:2.49   |

**Table S2.** Comparison of the electrochemical performance for the determination of AA, DA and UA.

| Electrode                              | Method                | Substance | Linear range (μM) | ΔE <sub>p</sub> (mV) | LOD (μM) | Ref.      |
|----------------------------------------|-----------------------|-----------|-------------------|----------------------|----------|-----------|
| MIL-125(Ti-Al)-75%NH <sub>2</sub> /GCE | DPV<br>(simultaneous) | AA        | 1000 – 3500       | 220<br>140           | 224      | This Work |
|                                        |                       | DA        | 5 – 90            |                      | 0.056    |           |
|                                        |                       | UA        | 5 – 90            |                      | 0.558    |           |
|                                        | DPV<br>(individual)   | AA        | 1000 – 6500       | —                    | 215      |           |
|                                        |                       | DA        | 5 – 100           |                      | 0.086    |           |
|                                        |                       | UA        | 5 – 120           |                      | 0.876    |           |
| Mn-BDC@MWCN T/GCE                      | DPV<br>(simultaneous) | AA        | 1 – 600           | 184<br>145           | 0.25     | 1         |
|                                        |                       | DA        | 0.5 – 660         |                      | 0.024    |           |
|                                        |                       | UA        | 0.05 – 1400       |                      | 0.023    |           |
|                                        | DPV<br>(individual)   | AA        | 0.1 – 1150        | —                    | 0.01     |           |
|                                        |                       | DA        | 0.01 – 500        |                      | 0.002    |           |
|                                        |                       | UA        | 0.02 – 1100       |                      | 0.005    |           |
| UIO-66-NO <sub>2</sub> @XC-72/GCE      | DPV<br>(simultaneous) | AA        | 0.2 – 3.5         | 215<br>150           | 0.12     | 2         |
|                                        |                       | DA        | 0.03 – 2.0        |                      | 0.005    |           |
|                                        |                       | UA        | 0.75 – 22         |                      | 0.03     |           |
| L-Co-MOF/CC                            | DPV                   | DA        | 0.0075 – 10       | 140                  | 0.001    | 3         |

|                                                                                                             |                       |                     |                                 |                          |            |    |
|-------------------------------------------------------------------------------------------------------------|-----------------------|---------------------|---------------------------------|--------------------------|------------|----|
|                                                                                                             |                       | (simultaneous)      | UA                              | 10 – 50<br>0021 – 70     | 8<br>0.007 |    |
|                                                                                                             |                       | DPV<br>(individual) | DA                              | 0.0056 – 10<br>10 – 70   | 0.002<br>5 |    |
|                                                                                                             |                       |                     | UA                              | 0.021 – 150<br>150 – 350 | 0.007      |    |
| GO-ZIF-67/GCE                                                                                               | DPV<br>(simultaneous) | DA                  | 0.2 – 80                        | 140                      | 0.05       | 4  |
|                                                                                                             |                       | UA                  | 0.8 – 200                       |                          | 0.1        |    |
| NiCo-MOF/Ti <sub>3</sub> C <sub>2</sub> /CC E                                                               | DPV<br>(simultaneous) | DA                  | 0.01 – 300                      | 128                      | 0.004      | 5  |
|                                                                                                             |                       | UA                  | 0.01 – 350                      |                          | 0.006      |    |
| ITO/g-C <sub>3</sub> N <sub>4</sub> /NC@GC/h-ATS                                                            | DPV<br>(simultaneous) | AA                  | 0.1 – 200                       | 236<br>204               | 0.02       | 6  |
|                                                                                                             |                       | DA                  | 2.5 – 100                       |                          | 0.01       |    |
|                                                                                                             |                       | UA                  | 2.5 – 625                       |                          | 0.06       |    |
| 3DGLCFs/GCE                                                                                                 | DPV<br>(simultaneous) | AA                  | 12.5 – 400                      | 230<br>130               | 2          | 7  |
|                                                                                                             |                       | DA                  | 0.05 – 10                       |                          | 0.01       |    |
|                                                                                                             |                       | UA                  | 0.05 – 15                       |                          | 0.01       |    |
| PAYR/GCE                                                                                                    | CV<br>(simultaneous)  | AA                  | 80 – 2000                       | 178<br>115               | 8.3        | 8  |
|                                                                                                             |                       | DA                  | 2.3 – 17.5                      |                          | 0.42       |    |
|                                                                                                             |                       | UA                  | 33 – 330                        |                          | 4.3        |    |
| PMo <sub>12</sub> @MIL-100(Fe)@PVP                                                                          | DPV<br>(simultaneous) | DA                  | 1 – 247                         | 146                      | 0.586      | 9  |
|                                                                                                             |                       | UA                  | 5 – 406                         |                          | 0.372      |    |
| Co <sub>3</sub> O <sub>4</sub> /Fe <sub>3</sub> O <sub>4</sub> /mC@g-C <sub>3</sub> N <sub>4</sub> -150/GCE | DPV<br>(simultaneous) | AA                  | 500 – 8000                      | 180<br>140               | 12.55      | 10 |
|                                                                                                             |                       | DA                  | 1.0 – 70                        |                          | 0.21       |    |
|                                                                                                             |                       | UA                  | 5.0 – 100                       |                          | 0.18       |    |
| MOF-235/GCE                                                                                                 | DPV                   | DA                  | 10 – 90                         | 133                      | 3.33       | 11 |
|                                                                                                             |                       | UA                  | 10 – 90                         |                          | 3.27       |    |
| Ni-MOF/GCE                                                                                                  | DPV                   | DA                  | 0.2 – 100                       | —                        | 0.06       | 12 |
| β-CD/Ni-MOF/GCE                                                                                             | DPV                   | DA                  | 0.7 – 310.2                     | —                        | 0.227      | 13 |
| HKUST-1/ITO                                                                                                 | DPV                   | AA                  | 10 – 25000<br>25000 –<br>265000 | —                        | 3          | 14 |
| ZIF-65@CNTs/GCE                                                                                             | DPV<br>(individual)   | AA                  | 200 – 2267                      | —                        | 1030       | 15 |

## S7. Supporting figures

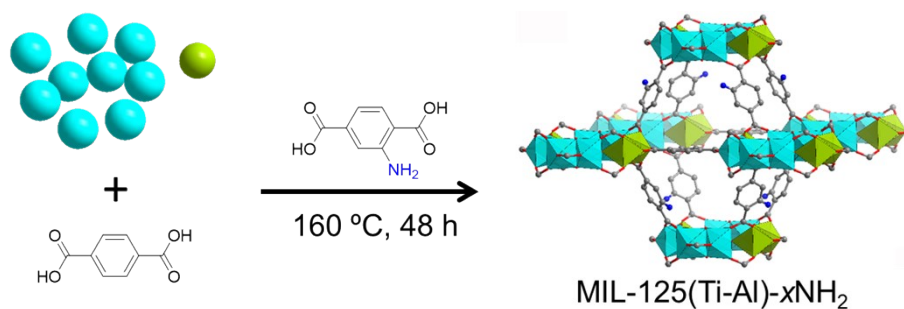

**Fig. S1** The schematic syntheses of MIL-125(Ti-Al)- $x$ NH<sub>2</sub> series. Color codes: Ti, cyan; Al, yellow.

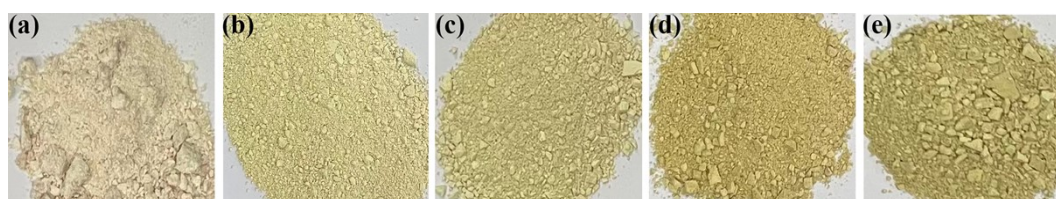

**Fig. S2** The optical photos of MIL-125(Ti-Al)- $x$ NH<sub>2</sub> ( $x = 0\%$ ,  $25\%$ ,  $50\%$ ,  $75\%$ , and  $100\%$ , from left to right), respectively.

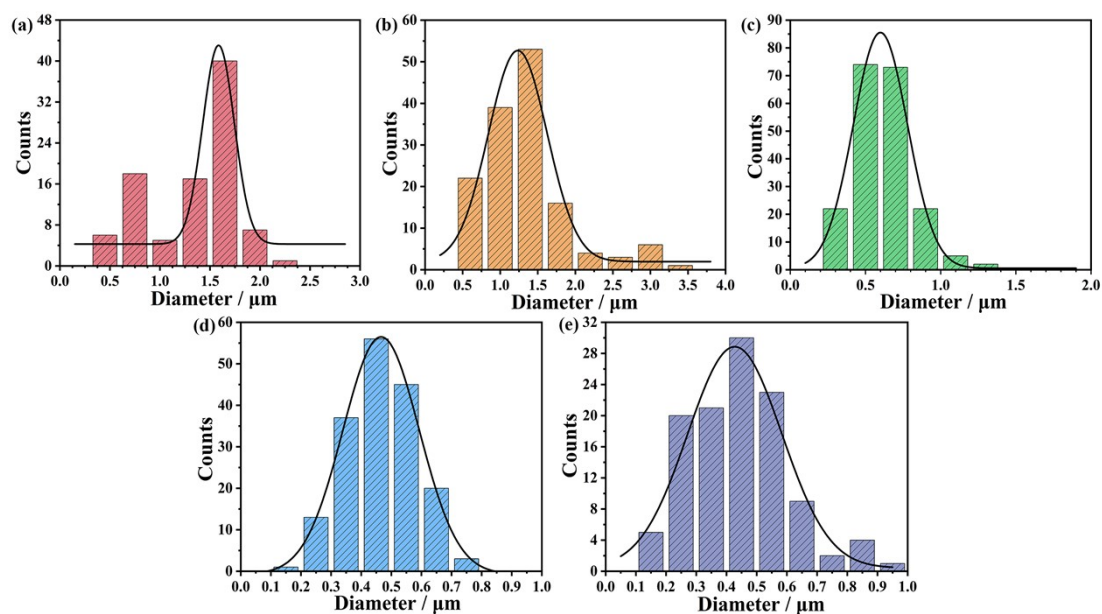

**Fig. S3** The size distribution histograms of MIL-125(Ti-Al)- $x$ NH<sub>2</sub> (a-e,  $x = 0\%$ ,  $25\%$ ,  $50\%$ ,  $75\%$ , and  $100\%$ ), respectively.

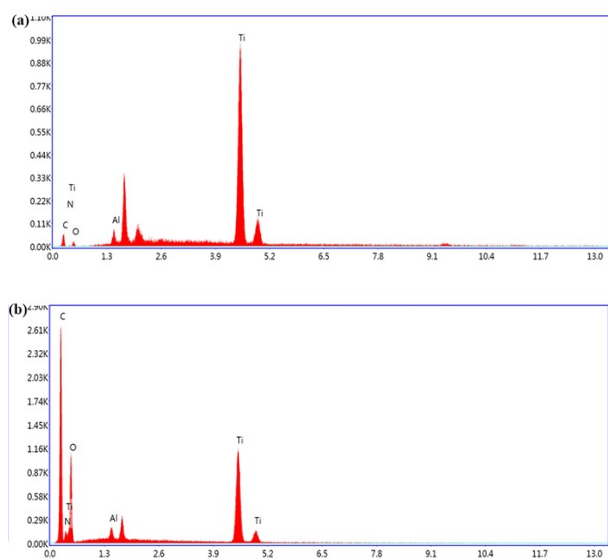

**Fig. S4** The EDS spectra of (a) MIL-125(Ti-Al)-0%NH<sub>2</sub> and (b) MIL-125(Ti-Al)-25%NH<sub>2</sub>.

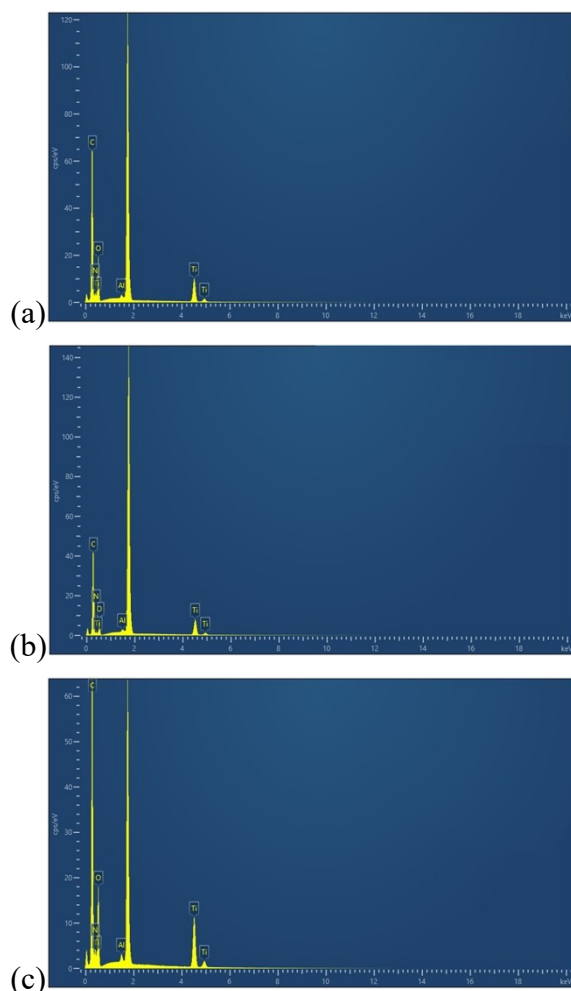

**Fig. S5** The EDS spectra of (a) MIL-125(Ti-Al)-50%NH<sub>2</sub>, (b) MIL-125(Ti-Al)-75%NH<sub>2</sub> and (c) MIL-125(Ti-Al)-100%NH<sub>2</sub>.



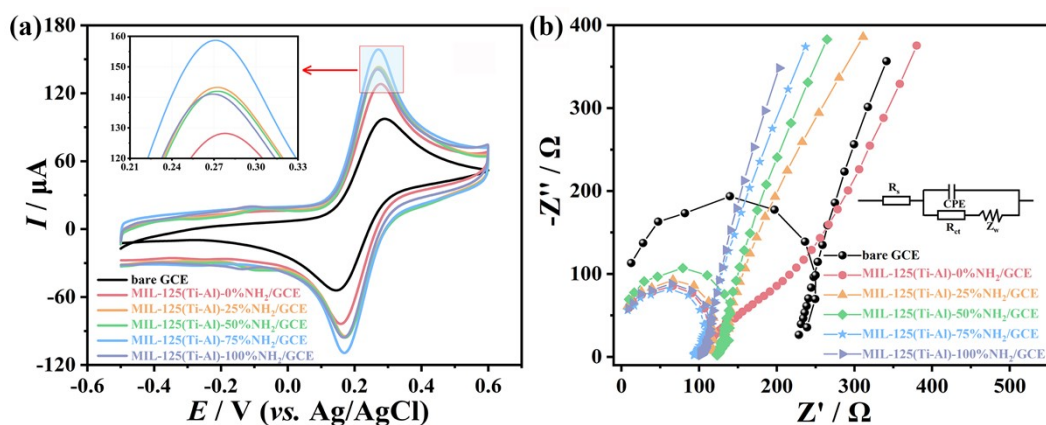

**Fig. S6** (a) CV curves and (b) Nyquist plots of bare GCE and MIL-125(Ti-Al)-*x*NH<sub>2</sub> (*x* = 0%, 25%, 50%, 75%, and 100%)/GCE in 0.1 M KCl containing 5 mM [Fe(CN)<sub>6</sub>]<sup>3-/4-</sup> (1:1). Scan rate: 50 mV s<sup>-1</sup>; frequency range, 0.1 Hz–500 kHz. (Inset of b: an approximate Randles' equivalent circuit model: *R<sub>s</sub>*, CPE, *R<sub>ct</sub>*, and *Z<sub>w</sub>* represent the solution resistance, constant phase element, charge transfer resistance, and Warburg element, respectively).

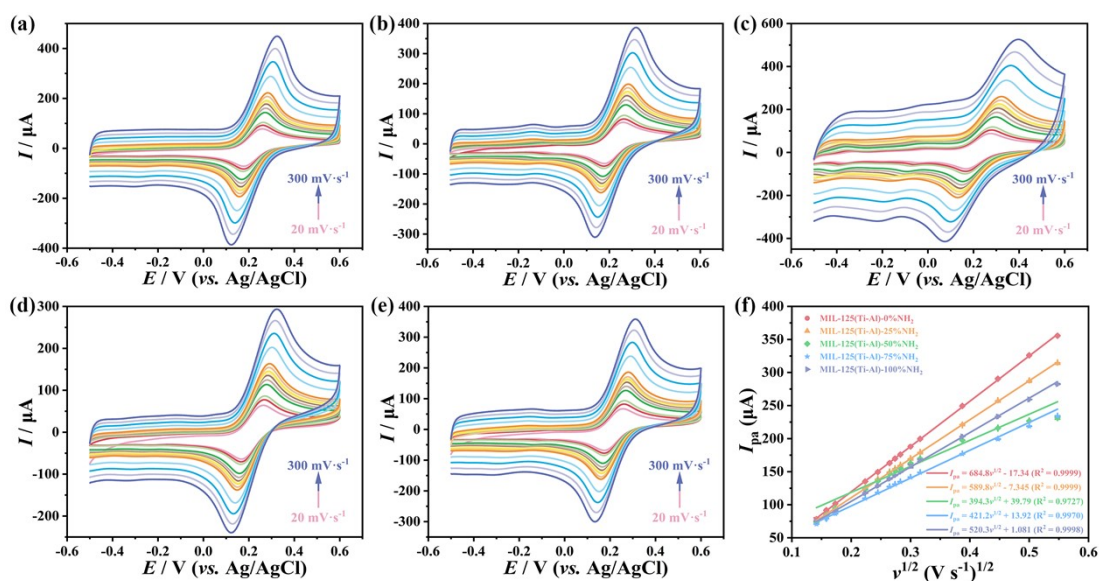

**Fig. S7** CV curves of MIL-125(Ti-Al)-*x*NH<sub>2</sub> (a-e, *x* = 0%, 25%, 50%, 75%, and 100%) modified electrodes with various scan rates (25, 30, 50, 60, 75, 80, 100, 150, 200 mV·s<sup>-1</sup>) in 0.1 M KCl containing 5 mM [Fe(CN)<sub>6</sub>]<sup>3-/4-</sup> (1:1), and (f) linear fitting curves corresponding to the peak current (*I<sub>pa</sub>*) and the square root of the scanning rate (*v*<sup>1/2</sup>) of modified electrodes.

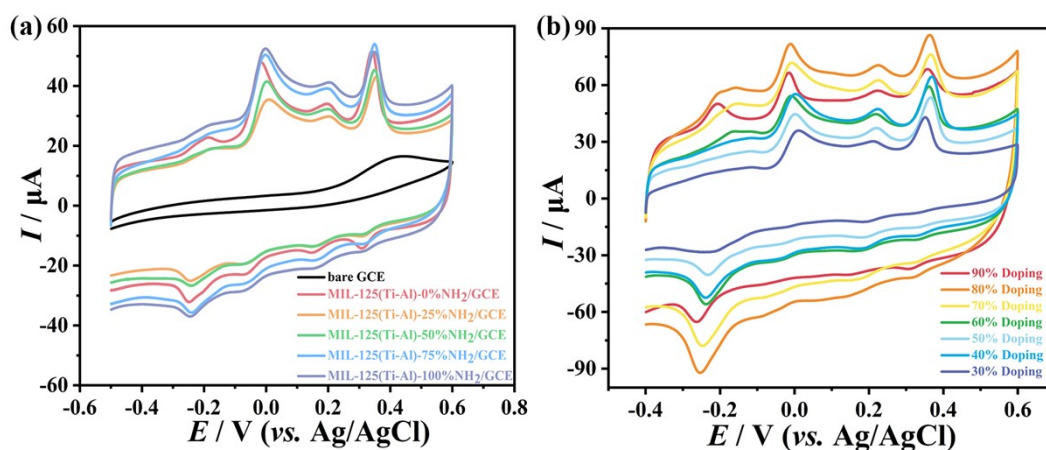

**Fig. S8** (a) Bare GCE and MIL-125(Ti-Al)- $x$ NH<sub>2</sub>/GCE with 50% XC-72R doping ratio at pH = 7.10, and (b) MIL-125(Ti-Al)-75%NH<sub>2</sub>/GCE materials mixed with different XC-72R doping ratios in 0.1 M PBS (pH 7.10) containing [AA]: 1 mM, [DA]: 30 μM, and [UA]: 50 μM. Scan rate: 100 mV·s<sup>-1</sup>.

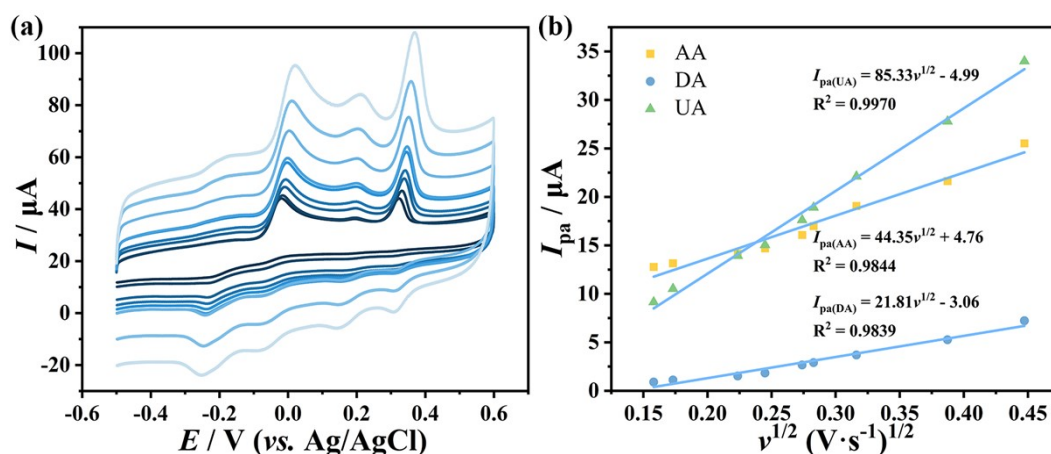

**Fig. S9** (a) CV curves of MIL-125(Ti-Al)-75%NH<sub>2</sub> modified electrodes with different scan rates (25, 30, 50, 60, 75, 80, 100, 150, 200 mV·s<sup>-1</sup>) in 0.1 M PBS solution containing [AA]: 1 mM, [DA]: 30 μM, and [UA]: 50 μM. And (b) linear fitting curves corresponding to the peak current ( $I_{pa}$ ) and the square root of the scanning rate ( $v^{1/2}$ ).

## References

1. M.-Q. Wang, C. Ye, S.-J. Bao, Y. Zhang, Y.-N. Yu and M.-W. Xu, *Analyst*, 2016, **141**, 1279-1285.
2. W. Zhang, J. Chen, Y. Li, W. Yang, Y. Zhang and Y. Zhang, *RSC Adv.*, 2017, **7**, 5628-5635.
3. F. Xu, L. Wang, M. Wua and G. Ma, *Sensor. Actuat. B-Chem.*, 2023, **386**, 133734.
4. J. Tang, S. Jiang, Y. Liu, S. Zheng, L. Bai, J. Guo and J. Wang, *Microchim. Acta*, 2018, **185**, 486.
5. X. Lu, F. Zhang, Y. M. Sun, K. Yu, W. Guo and F. Y. Qu, *Dalton. Trans.*, 2021, **50**, 16593-16600.
6. S. Krishnan, L. Tong, S. Liu and R. Xing, *Microchim. Acta*, 2020, **187**, 82.
7. W. Deng, X. Yuan, Y. Tan, M. Man and Q. Xie, *Biosens. Bioelectron.*, 2016, **85**, 618-624.
8. L. Zhang, H. Wang, J. Wu, Q. Liu, Y. Zhu, K. Zhang and G. Zhu, *Intern. J. Electrochem. Sci.*, 2019, **14**, 7623-7630.
9. X. Liu, G. Cui, L. Dong, X. Wang, Q. Zhen, Y. Sun, S. Ma, C. Zhang and H. Pang, *Anal. Biochem.*, 2022, **648**, 114670.
10. B. Hu, Y. Liu, Z.-W. Wang, Y. Song, M. Wang, Z. Zhang and C.-S. Liu, *Appl. Surf. Sci.*, 2018, **441**, 694-707.
11. K. Liu, Y. Chen, X. Dong and H. Huang, *Inorg. Chem. Commun.*, 2022, **142**, 109584.
12. Z. X. Huang, L. J. Zhang, P. F. Cao, N. Wang and M. Lin, *Ionics*, 2021, **27**, 1339-1345.
13. C. Chen, J. Ren, P. Zhao, J. Zhang, Y. Hu and J. Fei, *Microchem. J.*, 2023, **194**, 109328.
14. T. Shen, T. Liu, H. Mo, Z. Yuan, F. Cui, Y. Jin and X. Chen, *RSC Adv.*, 2020, **10**, 22881.
15. Y. Li, W. Ye, Y. Cui, B. Li, Y. Yang and G. Qian, *J. Mol. Struct.*, 2020, **1209**, 127986.
